# Supplementary material for: Electron cryotomography of SARS-CoV-2 virions reveals cylinder-shaped particles with a double layer RNP assembly
Source: Springer Nature journal article supplement (doi:10.1038/s42003-022-04183-1), 2022-11-10
Supplement: MOESM1 [file 42003_2022_4183_MOESM1_ESM.pdf]

## **Supplementary Information**

### **Electron cryotomography of SARS-CoV-2 virions reveals cylinder-shaped particles with a double layer RNP assembly**

Lesley J. Calder, Thomas Calcraft, Saira Hussain, Ruth Harvey and Peter B. Rosenthal

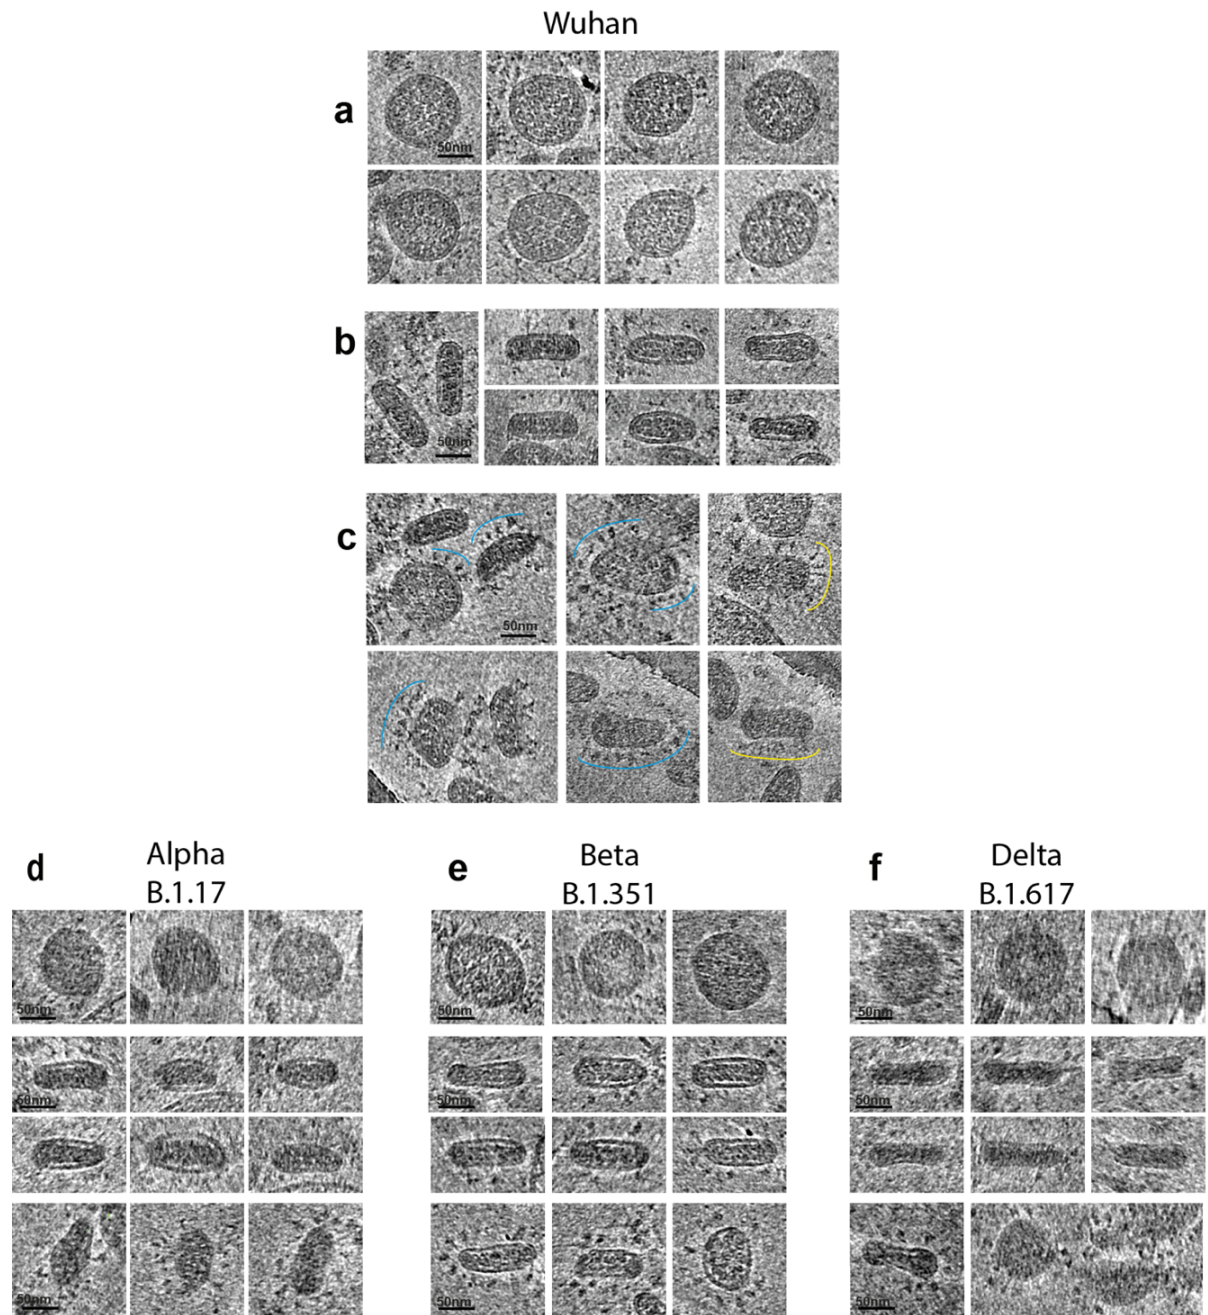

**Supplementary Figure 1. Gallery of SARS-CoV-2 particles from cryo-tomograms**

**a)** Gallery of Wuhan virions in circular top view. **b)** Gallery of virions in narrow side view. **c)** Gallery of virions, some in oblique cross section, showing surface spike proteins in pre-fusion conformation (blue arcs) and post-fusion conformation (yellow arcs). **d)** Alpha variant B1.17 virions **e)** Beta variant B.1.351 virions, and **f)** Delta variant B1.617 virions. Magnification is the same for all panels.

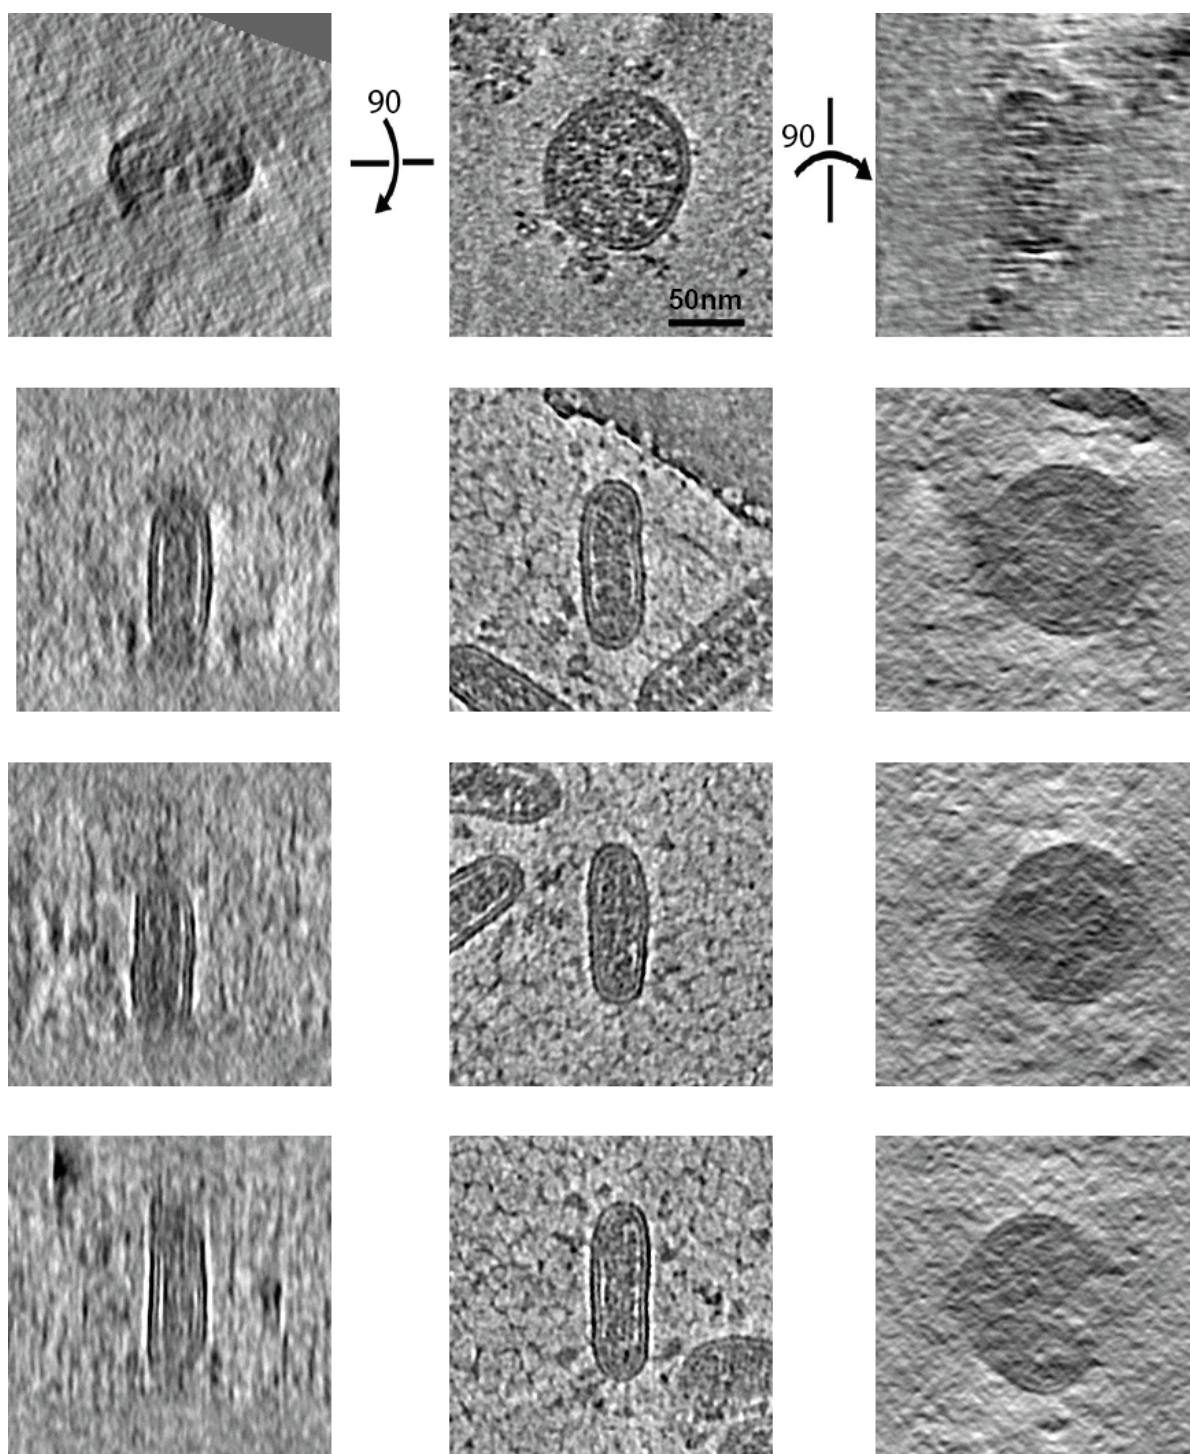

**Supplementary Figure 2. Tomogram analysis of Wuhan virions.**

Tomogram sections showing four virions along three orthogonal directions as labelled in Figure 1d. Centre panels are z sections of the tomogram, left and right correspond to x and y sections of the tomogram. Note: characteristic blurring is due to the missing wedge. Magnification is the same for all panels.



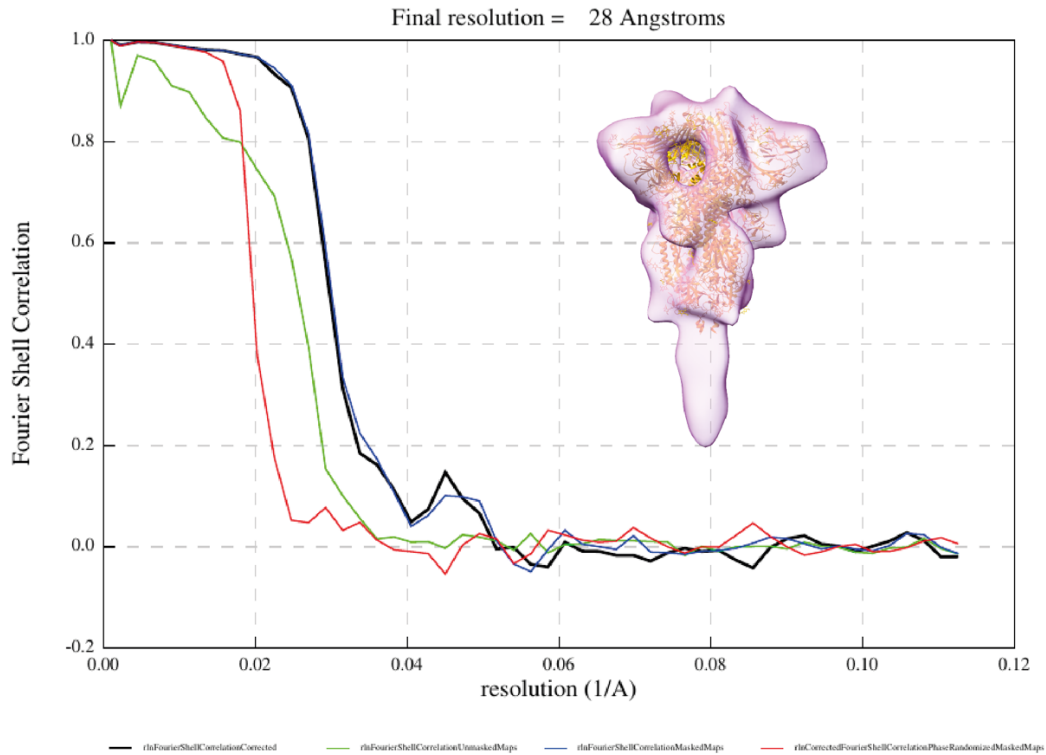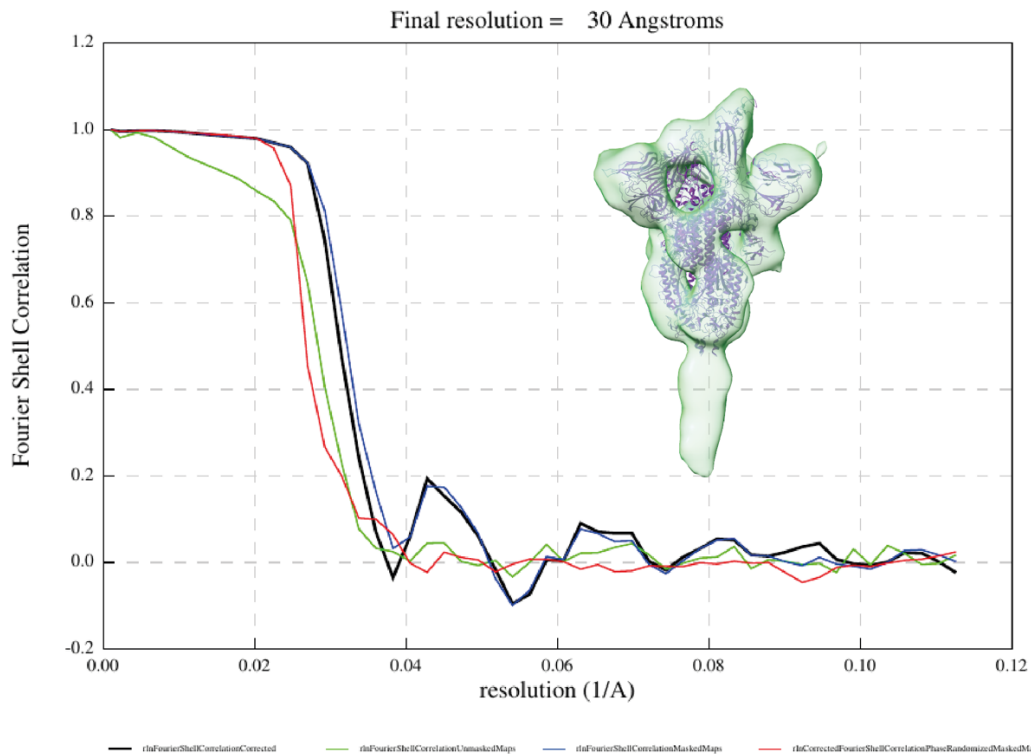

**Supplementary Figure 3. 3D reconstruction of spike protein from Wuhan strain virions.**

**a)** Closed form of the spike. FSC indicates 28 Å resolution map (0.143 threshold). Map is fit by spike model 6zge. **b)** Open form of the spike (one RBD erect). FSC indicates 30 Å map (0.143 threshold). Map is fit by model 6zgg. See also Table 1.

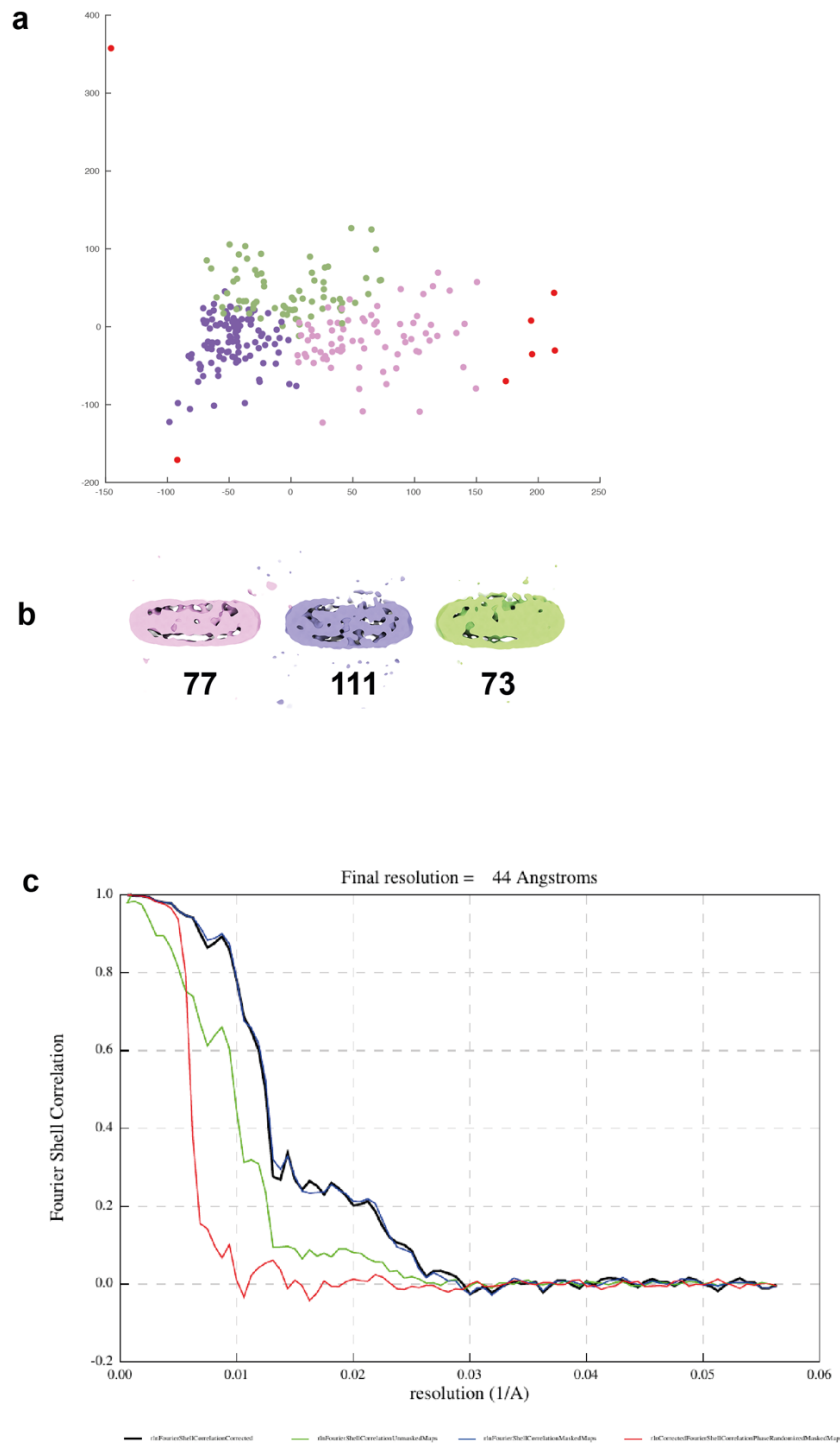

### Supplementary Figure 4. PCA of Wuhan Virions and FSC analysis of virion average

**a)** Principal component analysis (PCA) of 3D virion structure as described in Methods showing a continuum of particle shapes. Three classes containing 77, 111, and 73 particles out of 268 have points coloured as in b. Seven outliers in the analysis are red points. **b)** Virions are highly uniform but are a continuum between the narrowest cylindrical (pink) and the most ellipsoidal (green) class. **c)** FSC plot for virion average shown in Figure 3a indicates 44 Å (0.143 threshold).

**Supplementary Table 1: Summary of SARS-CoV2 virus particle analysis**

| <b>Variant:</b>                       | <b>Wuhan</b>       |                     |                     | <b>Alpha</b>        | <b>Beta</b>         | <b>Delta</b>         |                     |
|---------------------------------------|--------------------|---------------------|---------------------|---------------------|---------------------|----------------------|---------------------|
| Number of virus preparations analysed | 3                  |                     |                     | 1                   | 1                   | 2                    |                     |
| Number of cryo tilt series acquired   | Prep1              | Prep2               | Prep3               | 7 Talos             | 13 Talos            | Prep1                | Prep2               |
|                                       | 34 Krios           | 15 Talos            | 12 Talos            |                     |                     | 13 Talos             | 14 Talos            |
| Number of tomograms aligned           | 21                 | 3                   | 3                   | 3                   | 3                   | 3                    | 3                   |
| Number of virions measured            | 75                 | 30                  | 12                  | 26                  | 26                  | 31                   | 23                  |
| Circular Major Axis avg /nm           | 105<br>(stdv 6.7)  | 108.9<br>(stdv 7.5) | 103.5<br>(stdv 9.2) | 105.9<br>(stdv 9.0) | 108.0<br>(stdv 7.0) | 109.4<br>(stdv 11.2) | 107.0<br>(stdv 9.7) |
| Circular Minor Axis avg /nm           | 98.8<br>(stdv 5.7) | 100.5<br>(stdv 5.3) | 96.3<br>(stdv 9.3)  | 96.8<br>(stdv 5.2)  | 101.4<br>(stdv 6.5) | 100.2<br>(stdv 9.6)  | 97.8<br>(stdv 8.5)  |
| Cylinder Height avg /nm               | 39.4<br>(stdv 3.7) | 41.5<br>(stdv 6.8)  | 37.5<br>(stdv 4.8)  | 46.1<br>(stdv 4.5)  | 40.3<br>(stdv 8.5)  | 33.6<br>(stdv 10.9)  | 33.0<br>(stdv 4.9)  |
